# Supplementary material for: Regulation of myo-miR-24-3p on the Myogenesis and Fiber Type Transformation of Skeletal Muscle
Source: MDPI journal article supplement (doi:10.3390/genes15030269), 2024-02-21
Supplement: s1 [file s1]

## Supplementary information

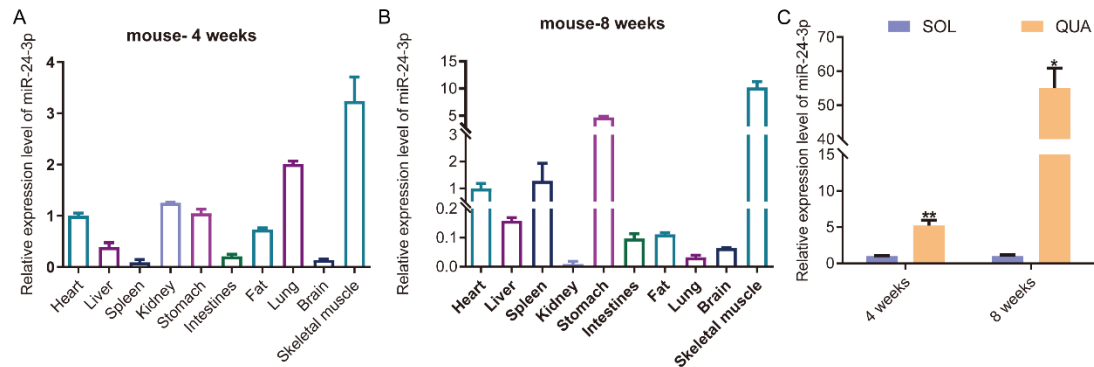

**Figure S1 miR-24-3p expression pattern in skeletal muscle**

(A-B) miR-24-3p expression in different tissues at weeks 4 and 8 of mouse development. (C) miR-24-3p expression in fast and slow muscles at weeks 4 and 8 of mouse development. Data are presented as mean  $\pm$  S.E.M and analyzed for statistical differences between groups using unpaired two-tailed t-tests. \* $p < 0.05$ , \*\* $p < 0.01$ .

**Table S1 Primer sequences for reverse transcription and qPCR**

| Name                | Sequence(5'-3')                                                                                                   |
|---------------------|-------------------------------------------------------------------------------------------------------------------|
| miR-24-3p           | RT: GTCGTATCCAGTGCAGGGTCCGAGGTATTTCG<br>CACTGGATACGACCTGTTC<br>F: GCGTGGCTCAGTTCAGCAG<br>R: GCCCTGCATCTTGAAATCTGA |
| Pig-U6              | F: CTCGCTTCGGCAGCACA<br>R: AACGCTTCACGAATTTGCGT                                                                   |
| Pig- $\beta$ -ACTIN | F: GCGGCATCCACGAAACTAC<br>R: TGATCTCCTTCTGCATCCTGTC                                                               |
| Pig-GAPDH           | F: AGGTCGGTGTGAACGGATTTG<br>R: TGTAGACCATGTAGTTGAGGTCA                                                            |
| Pig-NEAT            | F: GTCGATGCCCTGAACATG<br>R: GGTTAGCACGGAACCTACA                                                                   |
| Pig-KI67            | F: AGCCCGTATCTGGTGCAAAA<br>R: CCTGCATCTGTGTAAGGGCA                                                                |
| Pig-PCNA            | F: AAGTCAAATCTGGTCTTGTTAGCC<br>R: CACTGTCCTGGGATGCTTGAA                                                           |
| Pig-CDK4            | F: TGGTTACAAGTGGTGGGACA<br>R: CTGGAGCACGGTACCAGAGT                                                                |

---

|               |                                                                    |
|---------------|--------------------------------------------------------------------|
| Pig-CYCLIN A  | F: GCAGCAGCCTTTCATTTAGC<br>R: GGTGAAGGTCCAGGAGACAA                 |
| Pig-CYCLIN D2 | F: GTGCTGGGCAAGTTGAAGTG<br>R: GCGAACTTGAAGTCAGTGGC                 |
| Pig-MyoD      | F: ATGAGACATCCCCCTACTTCTACCA<br>R: GTCCCCAGCCCCTTATCTTCC           |
| Pig-MyoG      | F: CCTGCTCAGCTCCCTCAAC<br>R: CACAGCCACATCCTCCACT                   |
| Pig-MyHC      | F: GTTCAGAGAAAGGCATCCCCAA<br>R: GAGAGTGACCGACACCACAAGTG            |
| Pig-MYH7      | F: AAGGGCTTGAACGAGGAGTAGA<br>R: TTATTCTGCTTCCTCCAAAGGG             |
| Pig-MYH4      | F: ATGAAGAGGAACCACATTA<br>R: TTATTGCCTCAGTAGCTTG                   |
| Pig-MYH1      | F: AGAAGATCAACTGAGTGAAC<br>R: AGAGCTGAGAACTAACGTG                  |
| Pig-MAPK14    | F: CTACAGAGAACTGCGGTTACT<br>R: GTAAGCTTCTGACATTTACAA               |
| Pig-NLK       | F: TGGATATTGAGCCGGATAGA<br>R: GCAAGAGACCAGATTCTGGAA                |
| Pig-NEK4      | F: CAATTAGATGCCTCTAATGAGCT<br>R: CTCTAGTAATATTGTCAGAGG             |
| Pig-PIM1      | F: GCAAGACCTCTTCGACTTTATC<br>R: CGATGAGGATGTTCTCGTCCTT             |
| Pig-PSKH1     | F: CATCATCGCCAAGGGTTCTTTCA<br>R: TGCCTGGATGGTAGTAGAGCA             |
| Mouse-U6      | F: CTCGCTTCGGCAGCACA<br>R: AACGCTTCACGAATTTGCGT                    |
| Mouse-Gapdh   | F: CCTGTTGCTGTAGCCGTATT<br>R: CATCAAGAAGGTGGTGAAGC                 |
| Mouse-Pax7    | F: CCTGGAACAGACAGAGAGGAGCAGGAGAG<br>R: GTGAGTTCCTTCACTCTGCGCTCGTGC |
| Mouse-Ki67    | F: TGCCCGACCCTACAAAATG<br>R: GAGCCTGTATCACTCATCTGC                 |
| Mouse-Pcna    | F: GGGTGAAGTTTTCTGCAAGTG<br>R: GTACCTCAGAGCAAACGTTAGG              |
| Mouse-Cdk4    | F: ACAAGTAATGGGACCGTCAAG<br>R: GGGTGTTGCGTATGTAGACTG               |

---

---

|                 |                                                                    |
|-----------------|--------------------------------------------------------------------|
| Mouse-Cyclin D1 | F: GCCCTCCGTATCTTACTTCAAG<br>R: GCGGTCCAGGTAGTTCATG                |
| Mouse-Cyclin E1 | F: GCGAGGATGAGAGCAGTTC<br>R: AAGTCCTGTGCCAAGTAGAAC                 |
| Mouse-MyOD      | F: CCAGCACTACATTTGGCGACTAAT<br>R: GCTCCAATATGCTGGACAGGCAGT         |
| Mouse-MyOG      | F: GCCCAGTGAATGCAACTCCCACA<br>R: CAGCCGCGAGCAAATGATCTCCT           |
| Mouse-MyHC      | F: ACAAGCTGCAGCTGAAGGTG<br>R: TCATTCAGGCCCTTGGCAC                  |
| Mouse-Myh7      | F: ACAAGCTGCAGCTGAAGGTG<br>R: TCATTCAGGCCCTTGGCAC                  |
| Mouse-Myh1      | F: TGCAACAGTTCTTCAACCAC<br>R: GCCAGGTCCATCCCAAAGT                  |
| Mouse-Myh2      | F: CCAGCTGCACCTTCTCGTTTGCCAG<br>R: CATGGGGAAGATCTGGTCTTCTT         |
| Mouse-Myh4      | F: CCTGGAACAGACAGAGAGGAGCAGGAGAG<br>R: GTGAGTTCCTTCACTCTGCGCTCGTGC |
| Mouse-Mapk14    | F: GTTTCTCATCTACCAGATCCT<br>R: TAGCCTGTCATCTCATCATCA               |
| Mouse-Nlk       | F: GAGTCTTCCGGGAATTGAAGAT<br>R: AGATCACTCTGCATCAATTCT              |
| Mouse-Nek4      | F: ATTACATGAGCCCTGAGCTGTT<br>R: GTGCTGTAAACTTTTGGCATT              |
| Mouse-Pim1      | F: TTCGGCTCGGTCTACTCTGGCAT<br>R: ACCTTCTTCAACAGGACCA               |
| Mouse-Pskh1     | F: TATCAAGATGATAGAGACCA<br>R: AGCTCCATCACCATATATACAC               |

---

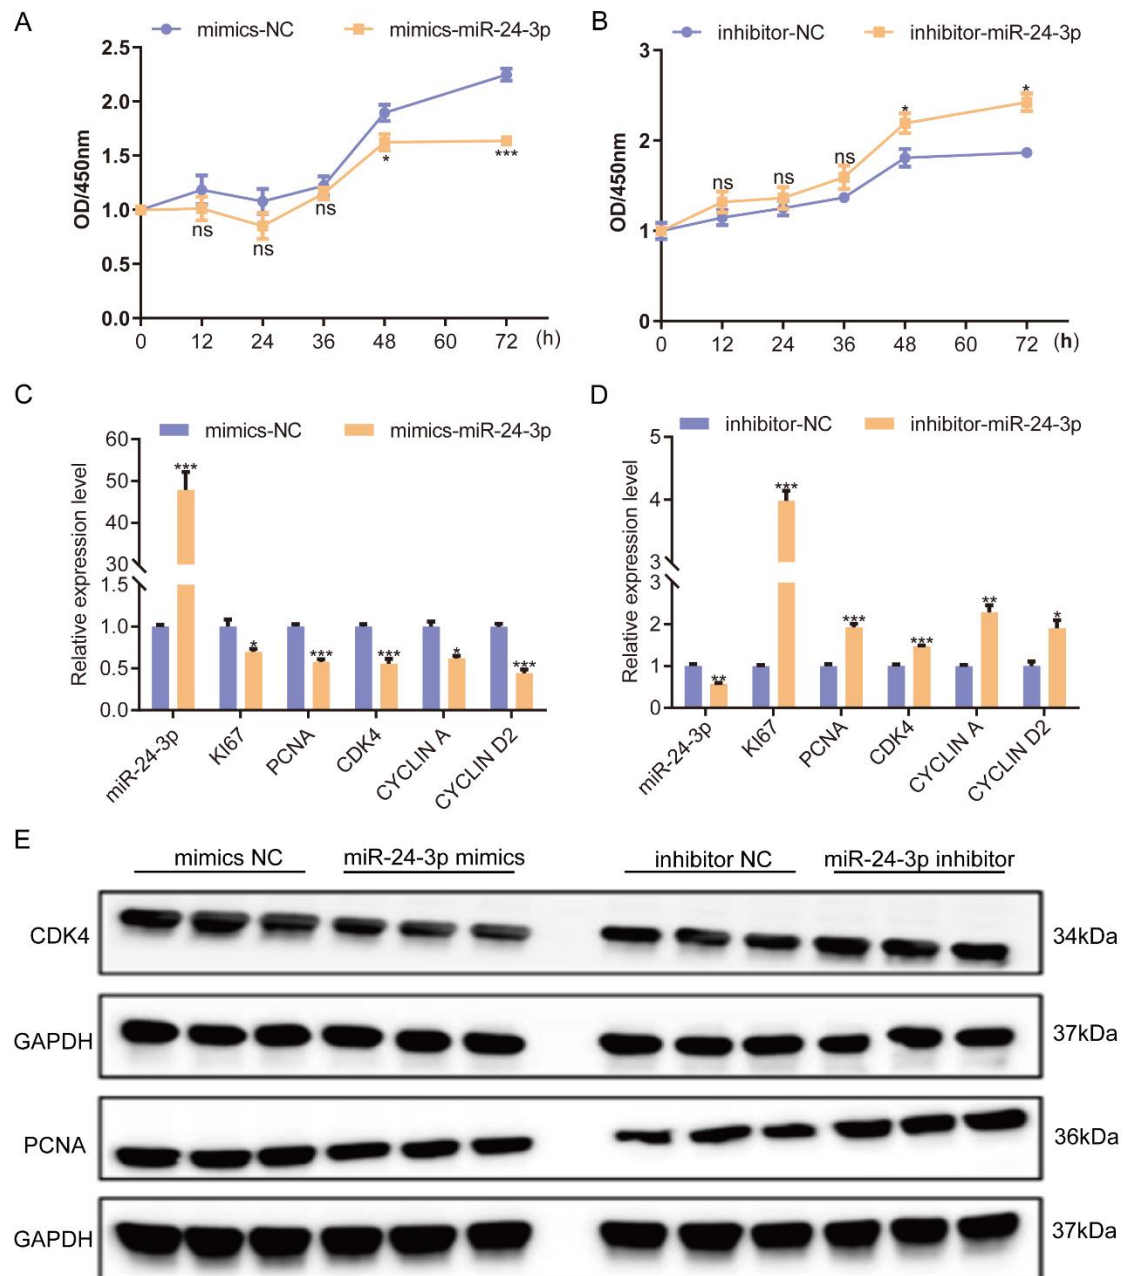

**Figure S2 Effect of miR-24-3p on C2C12 myoblasts differentiation**

(A-B) CCK-8 analyzed cell proliferation after miR-24-3p overexpression and knockdown in PSMCs. (C-D) qRT-PCR analyzed cell proliferation markers (KI67, PCNA, CDK4, CYCLIN A and CYCLIN D2) mRNA expression after miR-24-3p overexpression and knockdown in PSMCs. (E) Western blot analyzed proliferation markers (CDK4 and PCNA) protein expression after miR-24-3p overexpression and knockdown in PSMCs. Data are presented as mean  $\pm$  S.E.M and analyzed for statistical differences between groups using unpaired two-tailed t-tests.  $*p < 0.05$ ,  $**p < 0.01$ ,  $***p < 0.001$ , *ns* (not significant).

|         |               |                        |
|---------|---------------|------------------------|
|         |               | <u>seed sequence</u>   |
| Pig     | ssc-miR-24-3p | UGGCUCAGUUCAGCAGGAACAG |
| Mouse   | mmu-miR-24-3p | UGGCUCAGUUCAGCAGGAACAG |
| Rat     | rno-miR-24-3p | UGGCUCAGUUCAGCAGGAACAG |
| Human   | hsa-miR-24-3p | UGGCUCAGUUCAGCAGGAACAG |
| Rhesus  | mml-miR-24-3p | UGGCUCAGUUCAGCAGGAACAG |
| Cow     | bta-miR-24-3p | UGGCUCAGUUCAGCAGGAACAG |
| Chicken | gga-miR-24-3p | UGGCUCAGUUCAGCAGGAACAG |
|         |               | *****                  |

**Figure S3 conservation analysis of miR-24-3p sequence in different species**

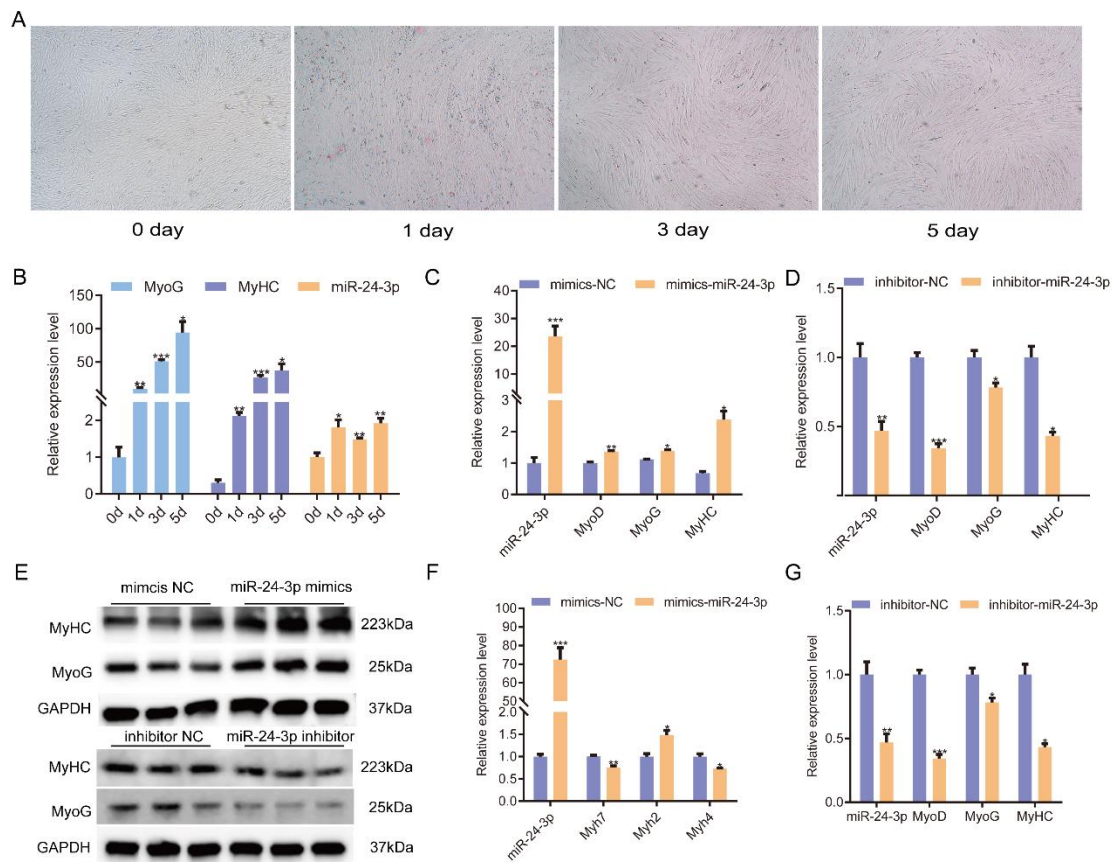

**Figure S4 Effect of miR-24-3p on skeletal muscle fiber type transformation in pig**  
 (A) PSMCs were induced to differentiate for different days (0d, 1d, 3d and 5d). Scale bar: 50  $\mu$ m.  
 (B) qRT-PCR analyzed the expression pattern of MyoG, MyHC and miR-24-3p during PSMCs differentiation. (C-D) qRT-PCR analyzed the expression of miR-24-3p, MyoG, MyHC and MyoD after miR-24-3p overexpression and knockdown. (E) Western blot analyzed the protein expression of MyoG and MyHC after miR-24-3p overexpression and knockdown. (F-G) qRT-PCR analyzed the expression of differentiation and transformation markers expression after miR-24-3p overexpression and knockdown. Data are presented as mean  $\pm$  S.E.M and analyzed for statistical differences between groups using unpaired two-tailed t-tests. \* $p < 0.05$ , \*\* $p < 0.01$ , \*\*\* $p < 0.001$ .

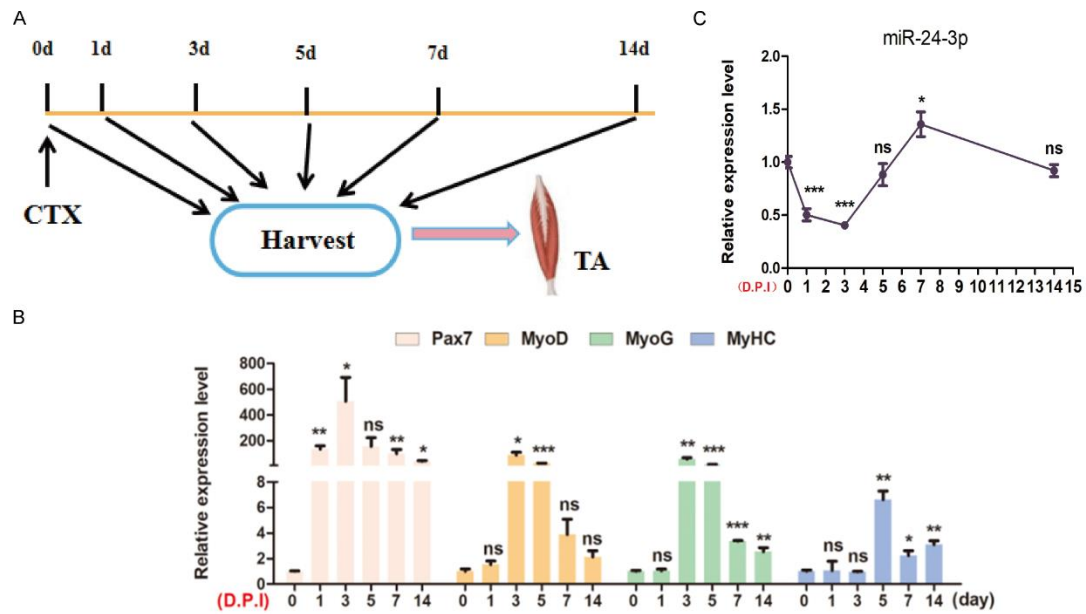

**Figure S5 The miR-24-3p expression during skeletal muscle regeneration**

(A) Schematic representation of the skeletal muscle regeneration. (B-C) qRT-PCR analyzed the expression pattern of Pax7, MyoD, MyoG, MyHC and miR-24-3p during skeletal muscle regeneration. Data are presented as mean  $\pm$  S.E.M and analyzed for statistical differences between groups using unpaired two-tailed t-tests. \* $p < 0.05$ , \*\* $p < 0.01$ , \*\*\* $p < 0.001$ , *ns* (not significant)

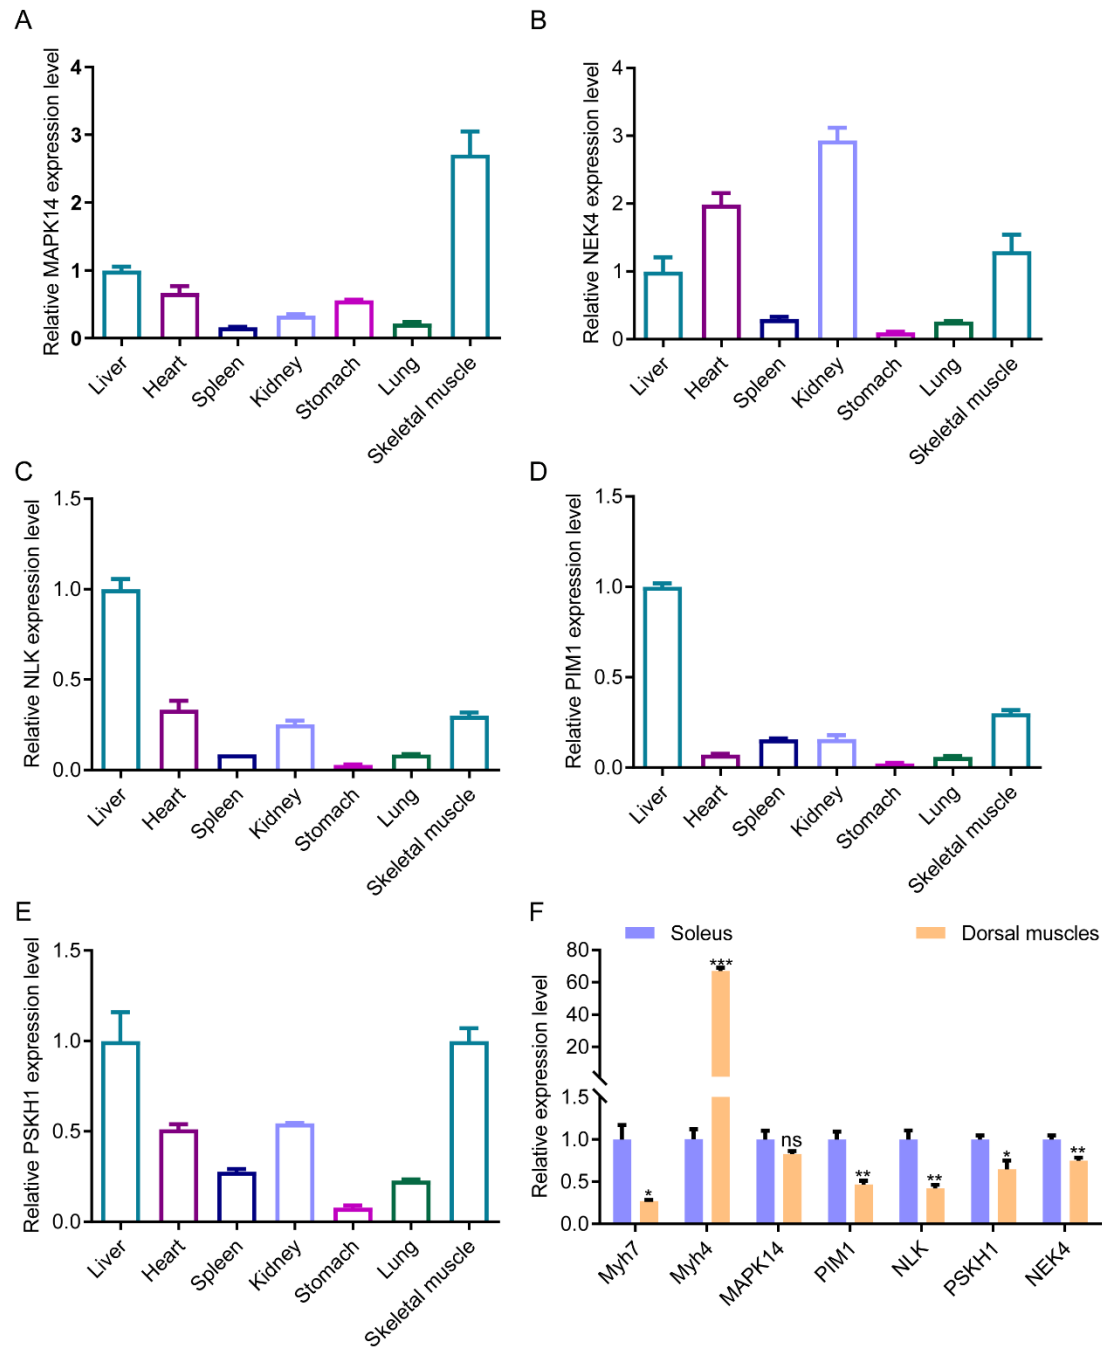

**Figure S6 The effects of ssc-miR-24-3p on proliferation marker genes of porcine skeletal muscle primary cells**

The expression levels of MAPK14 (A), NEK4 (B), PSKH1 (C), PIM1 (D) and NLK (E) in pig tissues. (F) Expression levels of potential target genes of ssc-miR-24-3p in pig fast and slow muscle. Data are presented as mean  $\pm$  S.E.M and analyzed for statistical differences between groups using unpaired two-tailed t-tests. \* $p < 0.05$ , \*\* $p < 0.01$ , \*\*\* $p < 0.001$ ,  $ns$  (not significant).

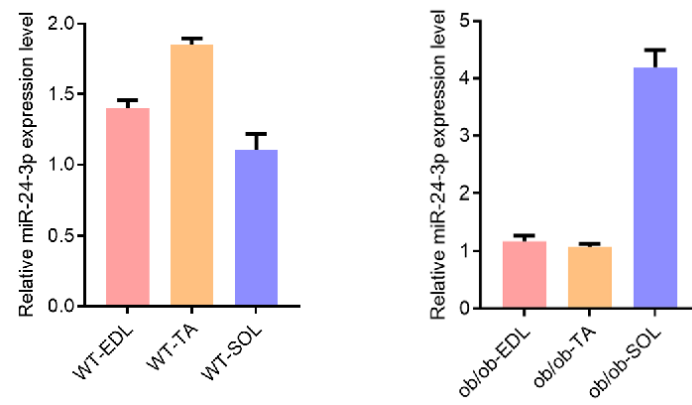

Figure S7: Fast and slow muscle expression in wild mice and ob/ob mice.
